# Supplementary material for: New insights into the Shwachman-Diamond Syndrome-related haematological disorder: hyper-activation of mTOR and STAT3 in leukocytes
Source: PubMed Central journal article supplement (PMC5034238; doi:10.1038/srep33165), 2016-09-23

# **New insights into the Shwachman-Diamond Syndrome-related haematological disorder: hyper-activation of mTOR and STAT3 in leukocytes.**

Valentino Bezzetti, Antonio Vella, Elisa Calcaterra, Alessia Finotti, Jessica Gasparello, Roberto Gambari, Baroukh Maurice Assael, Marco Cipolli and Claudio Sorio

## **SUPPLEMENTARY INFORMATION**

### **Supplementary Figure legends**

#### **Supplementary figure S1**

##### **SBDS protein expression in LCLs.**

Western blot analysis to evaluate SBDS protein expression in LCLs. LY52 and LY53: LCLs derived from healthy control subjects. LY190, LY193, LY198: LCLs obtained from SDS patients carrying genotype 258+2T>C / 183-184TA>CT.

#### **Supplementary figure S2**

##### **Western Blot analysis of mTOR S727 phosphorylation in LCLs.**

Increase of S2448 phosphorylated mTOR in SDS. **a)** western blotting analysis using the polyclonal rabbit antibody recognizing the S2448 phosphorylated form of mTOR (arrowed). **b)** representative western blotting analysis of protein extracts from a control subject (on the left) and a SDS patient (on the right) and summary of the relative content of the S2448 phosphorylated mTOR in control (open box) and SDS-derived LCLs (black box). Data are mean  $\pm$  SD of two independent experiments performed in duplicate. Student's t test has been reported. **c)** representative western blotting analysis of protein extracts from SDS LCLs culture in the absence or in the presence of IL-6, with (+) or without (-) 350 nM rapamycin. **d)** summary of the relative content of the S2448

phosphorylated mTOR in control (open box) and SDS patients (black box). Data represent the % values relative to untreated cells. The S2448 phosphorylated mTOR is presented in control (open box) and SDS-derived LCLs induced (+) or not (-) with IL-6. Data are mean  $\pm$  SD of two independent experiments performed in duplicate. Student's t test has been reported.

### **Supplementary figure S3**

#### **Effect of SBDS gene silencing in LCLs on mTOR S2448 phosphorylation and role of ERK1/2**

**MAPK.** **a)** LCLs derived from healthy donors were transiently transfected with 2 different specific siRNA sequences (siRNA 1 and siRNA 2) for SBDS, or with PE-conjugated siRNA sequence, or with scrambled sequence as control in the presence of cationic liposomal vector for 24 hours. mTOR S2448 phosphorylation was detected using PathScan phospho-mTOR ELISA kit. Data are mean  $\pm$  SEM of 5 independent experiments performed in 3 different healthy control cell lines, in duplicate. **b)** Effect of pre-incubation of ERK inhibitor U0126 (10  $\mu$ M) in SDS-derived LCLs for 1 hour before stimulation with IL-6 (10 ng/ml) for further 15 min. Data are mean  $\pm$  SEM of 6 independent experiments performed in 3 different healthy control cell lines, in duplicate. Wilcoxon signed-rank test has been calculated.

### **Supplementary figure S4**

#### **Flow cytometric analysis of mTOR S2448 phosphorylation in primary leukocytes.**

Representative experiment conducted in leukocytes derived from peripheral blood of a SDS patient carrying genotype 258+2T>C/183-184TA>CT compared to a healthy control subject. **a)** morphological distribution of CD45 expressing leukocytes in healthy donor derived peripheral blood. **b)** morphological distribution of CD45 expressing leukocytes in SDS patient derived peripheral blood. PMNs, Monocytes and Lymphocytes are gated. **c,d)** B cell (CD19+) region isolated from lymphocytes regions of panels A and B, respectively, plotted on CD3 versus CD19 dotplot. **e)** mTOR S2448 phosphorylation observed in B cells in the presence or in the absence (UT) of IL-6 stimulation (10 ng/ml) for 15 min. **f)** mTOR S2448 phosphorylation observed in PMNs in the presence or in the absence of IL-6 stimulation (10 ng/ml) for 15 min. **g)** mTOR S2448

phosphorylation observed in Monocytes in the presence or in the absence of IL-6 stimulation (10 ng/ml) for 15 min.

### **Supplementary figure S5**

#### **Effect of rapamycin on mTOR S2448 phosphorylation in primary leukocytes.**

Primary leukocytes derived from two patients carrying genotype 258+2T>C / 183-184TA>CT and from two healthy control subjects were incubated in the presence or in the absence of rapamycin for 1 hour before IL-6 stimulation (10 ng/ml) for further 15 min and analyzed by flow cytometry. **a,b)** MFI of mTOR S2448 phosphorylation measured in primary B cells derived from healthy control and SDS patient, respectively. **c,d)** MFI of mTOR S2448 phosphorylation measured in primary PMNs derived from healthy control and SDS patient, respectively. **e,f)** MFI of mTOR S2448 phosphorylation measured in primary monocytes derived from healthy control and SDS patient, respectively. Data are mean  $\pm$  SEM of two independent experiments performed in LCLs obtained from three different SDS patients and compared to three different healthy donors. Student's t test has been calculated.

### **Supplementary figure S6**

#### **Flow cytometric analysis of STAT3 Y705 and S727 phosphorylation in primary leukocytes.**

Representative experiment conducted in leukocytes derived from peripheral blood cells of a SDS patients carrying genotypes 258+2T>C / 183-184TA>CT compared to a healthy control subject. **a)** STAT3 phosphorylation observed in B cells in the presence or in the absence (UT) of IL-6 stimulation (10 ng/ml) for 15 min. **b)** STAT3 phosphorylation observed in PMNs in the presence or in the absence of IL-6 stimulation (10 ng/ml) for 15 min. **c)** STAT3 phosphorylation observed in Monocytes in the presence or in the absence of IL-6 stimulation (10 ng/ml) for 15 min.

### **Supplementary figure S7**

#### **Effect of rapamycin on STAT3 Y705 phosphorylation in primary leukocytes.**

Primary leukocytes derived from two patients carrying genotype 258+2T>C / 183-184TA>CT and from two healthy control subjects were incubated in the presence or in the absence of rapamycin for 1 hour before IL-6 stimulation (10 ng/ml) for further 15 min and analyzed by flow cytometry. **a,b)** MFI of STAT3 Y705 phosphorylation measured in primary B cells derived from healthy control and SDS patient, respectively. **c,d)** MFI of STAT3 Y705 phosphorylation measured in primary PMNs derived from healthy control and SDS patient, respectively. **e,f)** MFI of STAT3 Y705 phosphorylation measured in primary monocytes derived from healthy control and SDS patient, respectively. Data are mean  $\pm$  SEM of two independent experiments performed in LCLs obtained from three different SDS patients and compared to three different healthy donors. Student's t test has been calculated.

### **Supplementary figure S8**

#### **Effect of rapamycin on STAT3 S727 phosphorylation in primary leukocytes.**

Primary leukocytes derived from two patients carrying genotype 258+2T>C / 183-184TA>CT and from two healthy control subjects were incubated in the presence or in the absence of rapamycin for 1 hour before IL-6 stimulation (10 ng/ml) for further 15 min and analyzed by flow cytometry. **a,b)** MFI of STAT3 S727 phosphorylation measured in primary B cells derived from healthy control and SDS patient, respectively. **c,d)** MFI of STAT3 S727 phosphorylation measured in primary PMNs derived from healthy control and SDS patient, respectively. **e,f)** MFI of STAT3 S727 phosphorylation measured in primary monocytes derived from healthy control and SDS patient, respectively. Data are mean  $\pm$  SEM of two independent experiments performed in LCLs obtained from three different SDS patients and compared to three different healthy donors. Student's t test has been calculated.

**SUPPLEMENTARY FIGURES**

**Figure S1**

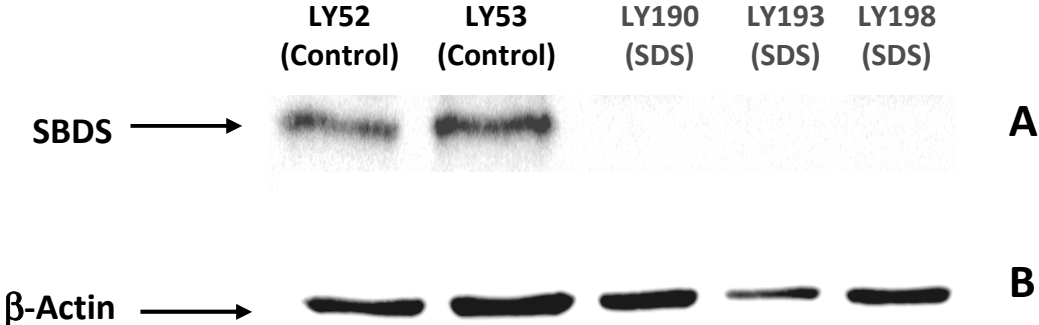

**Figure S2**

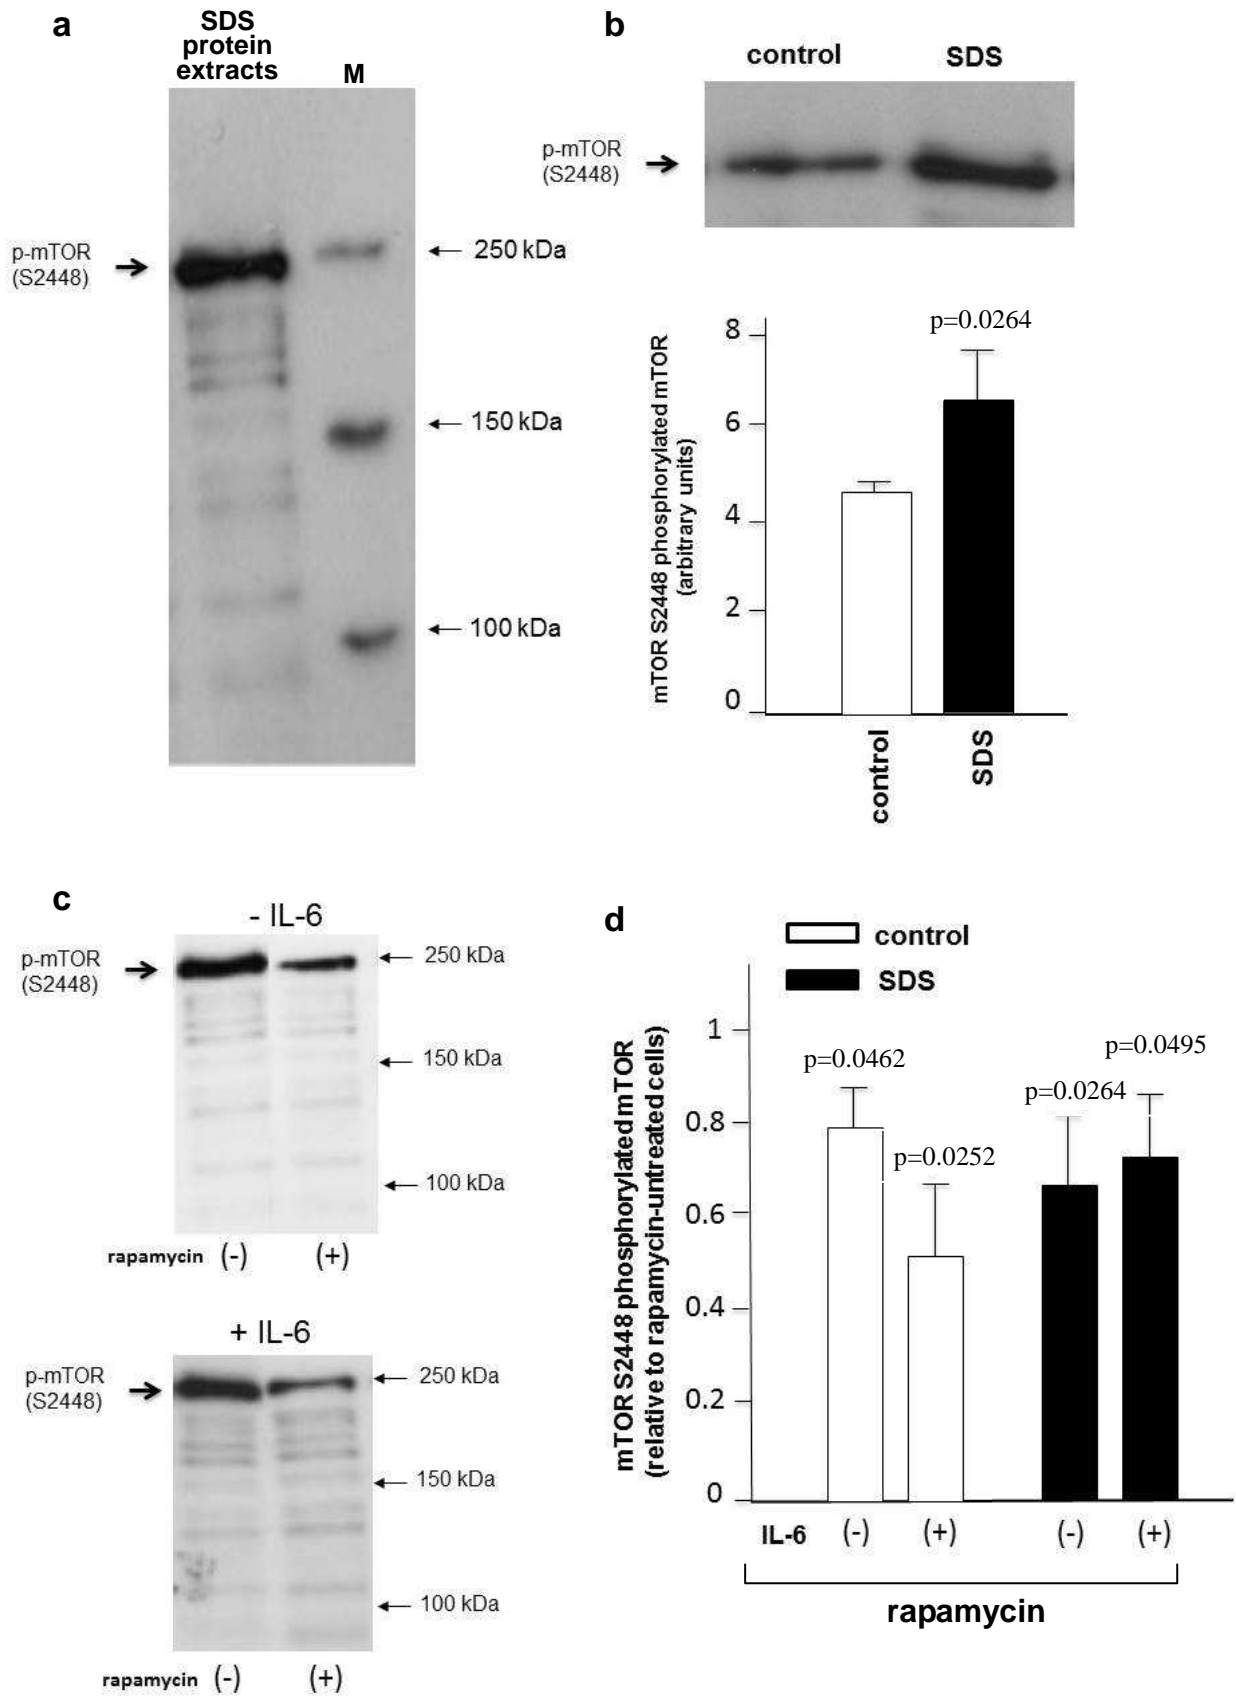

Figure S3

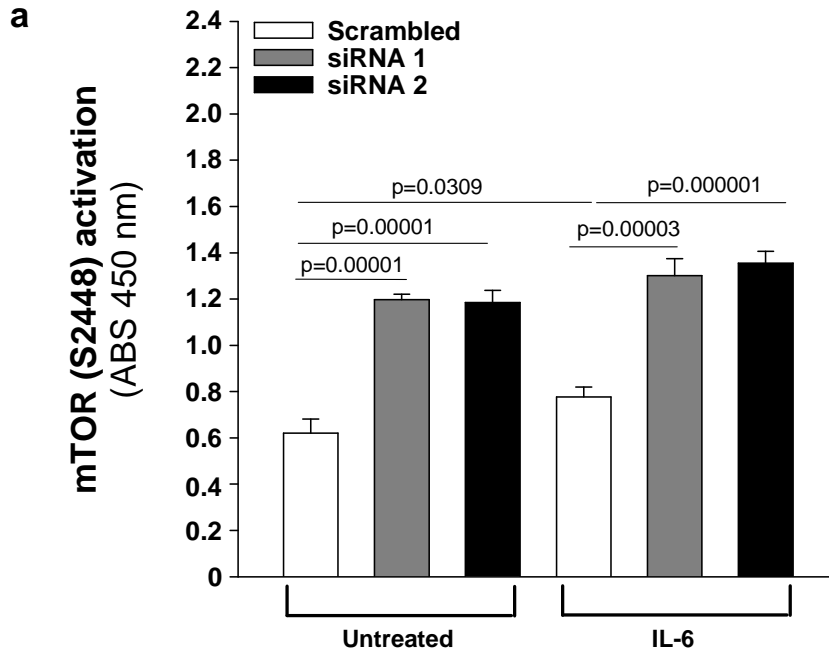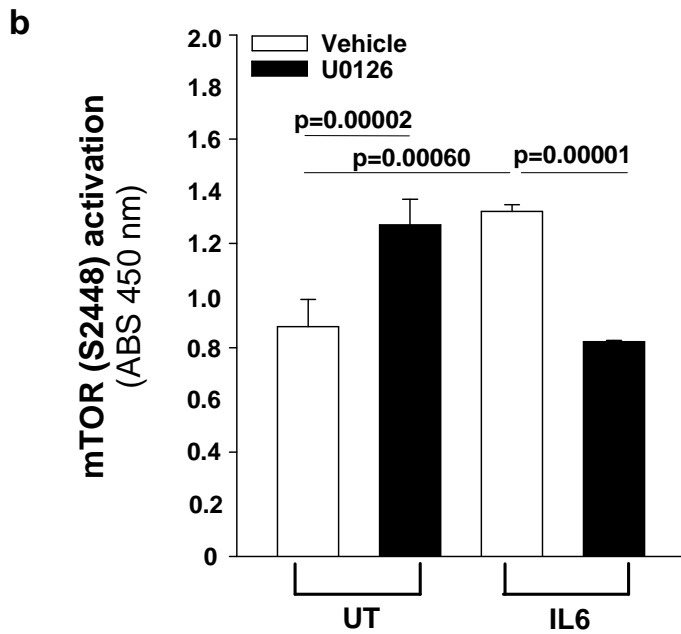

**Figure S4**

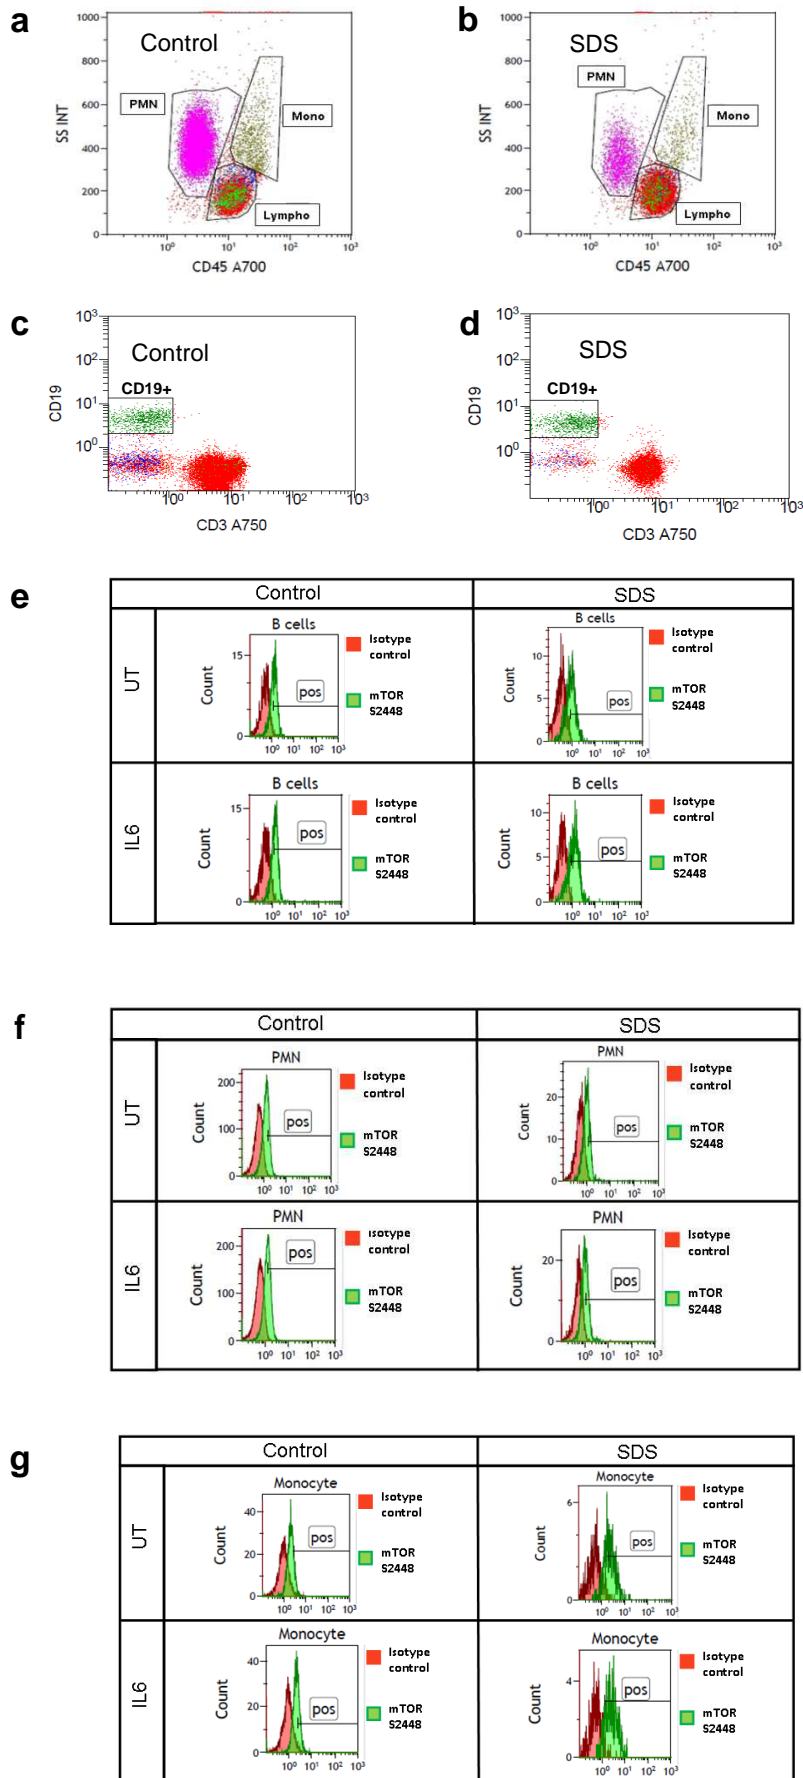



Figure S5

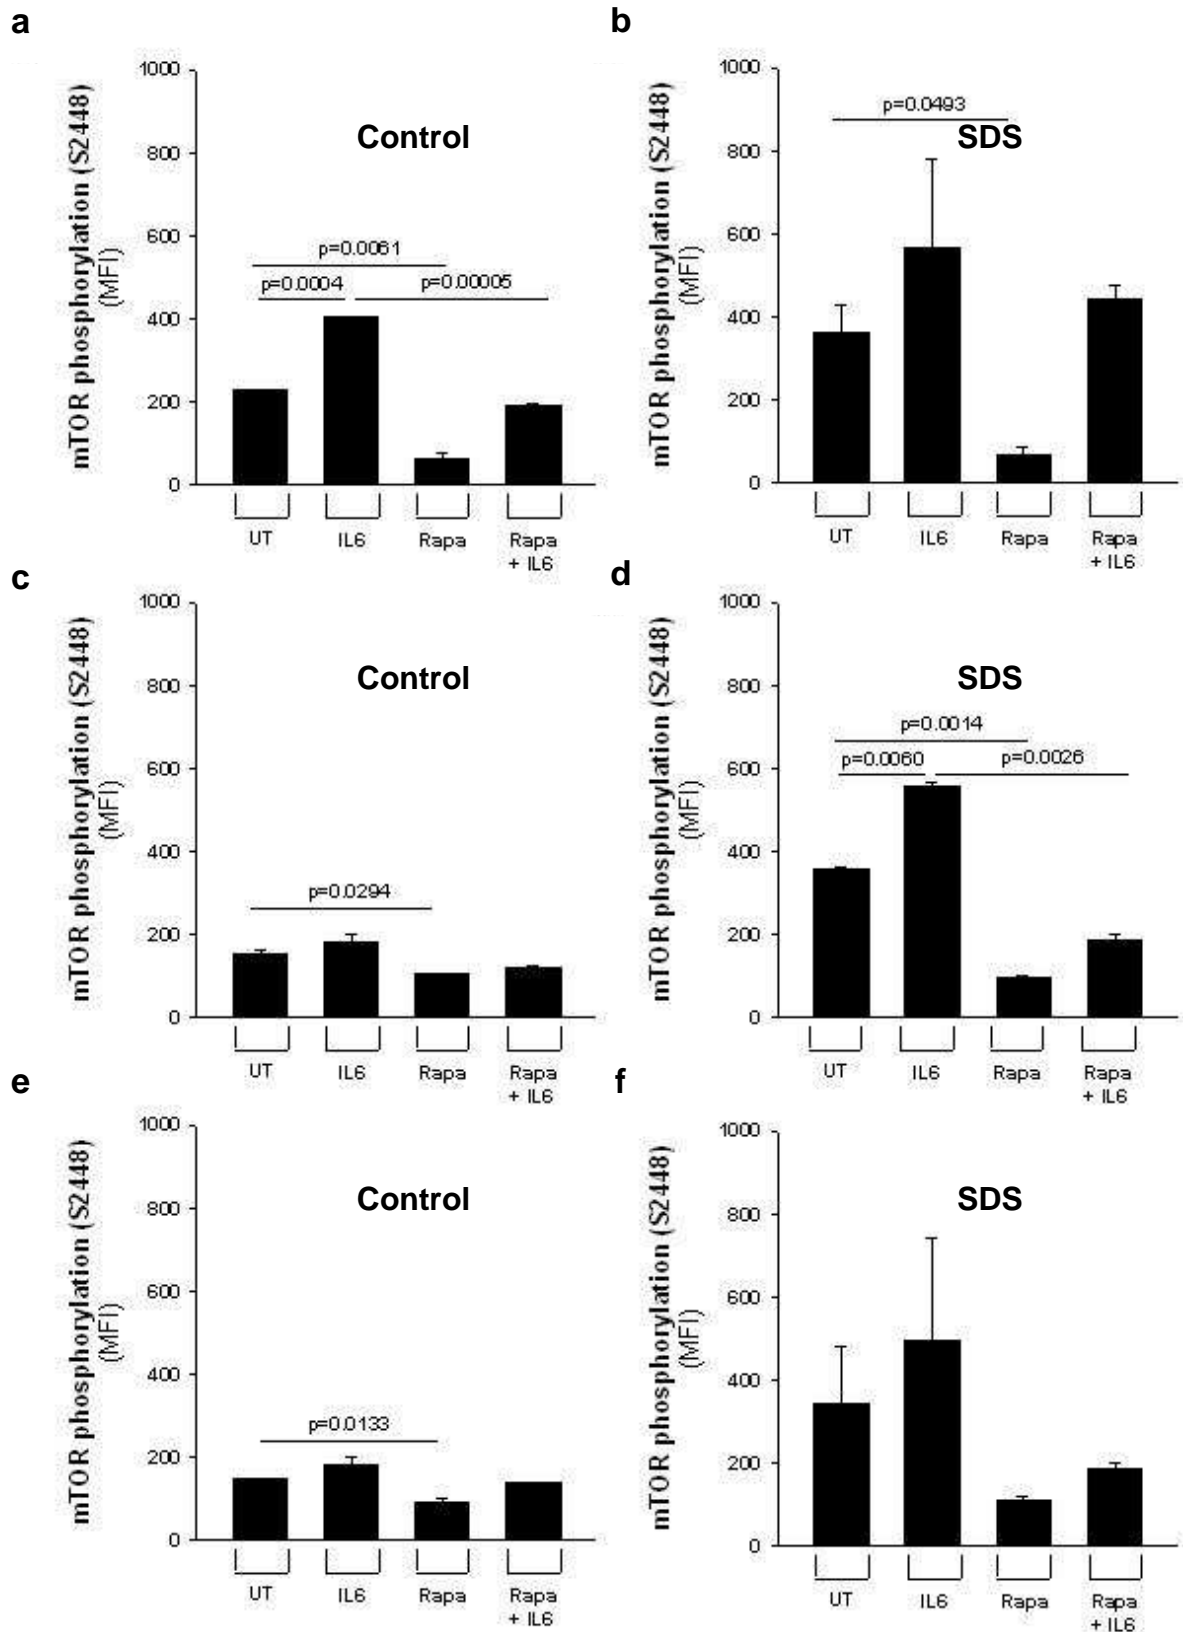

**Figure S6**

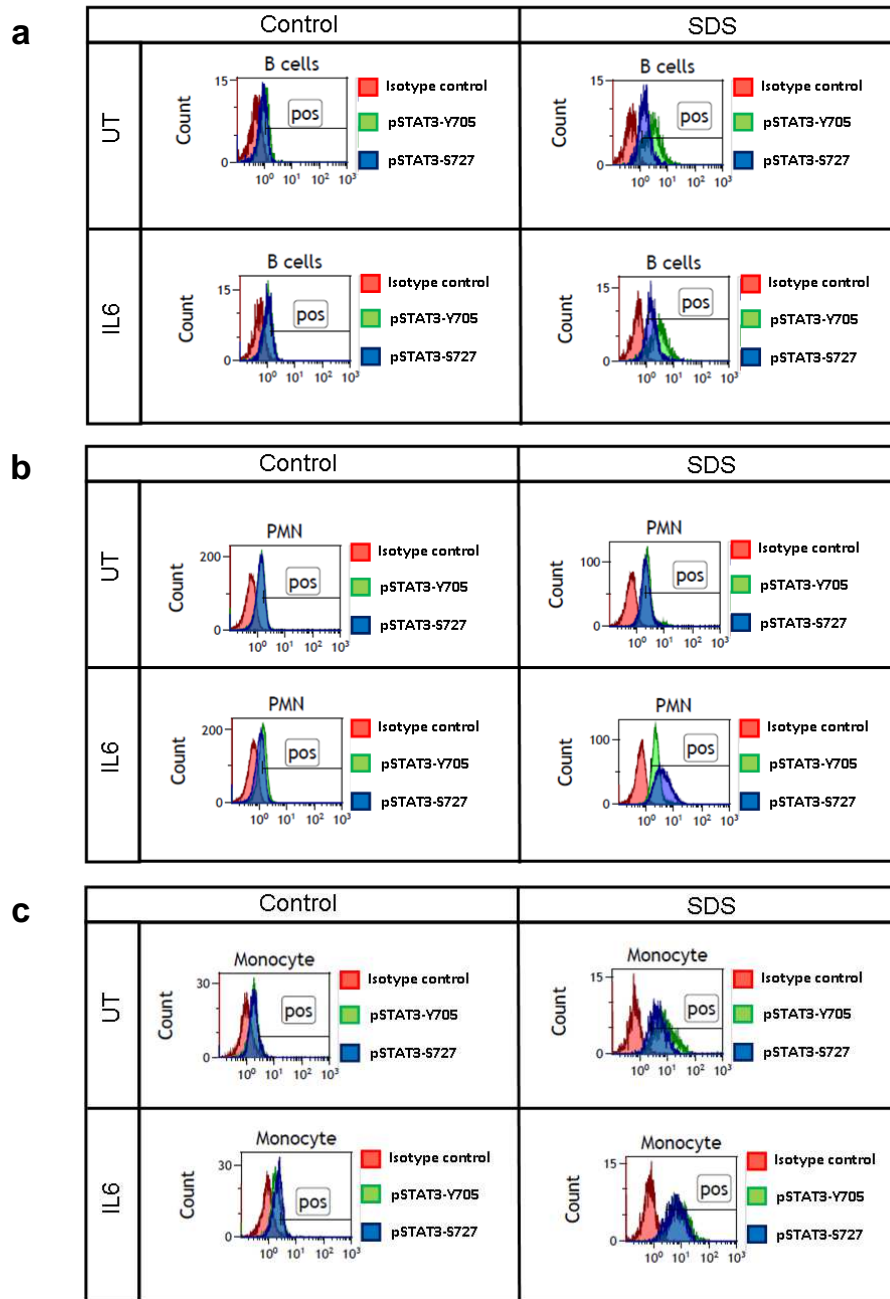

Figure S7

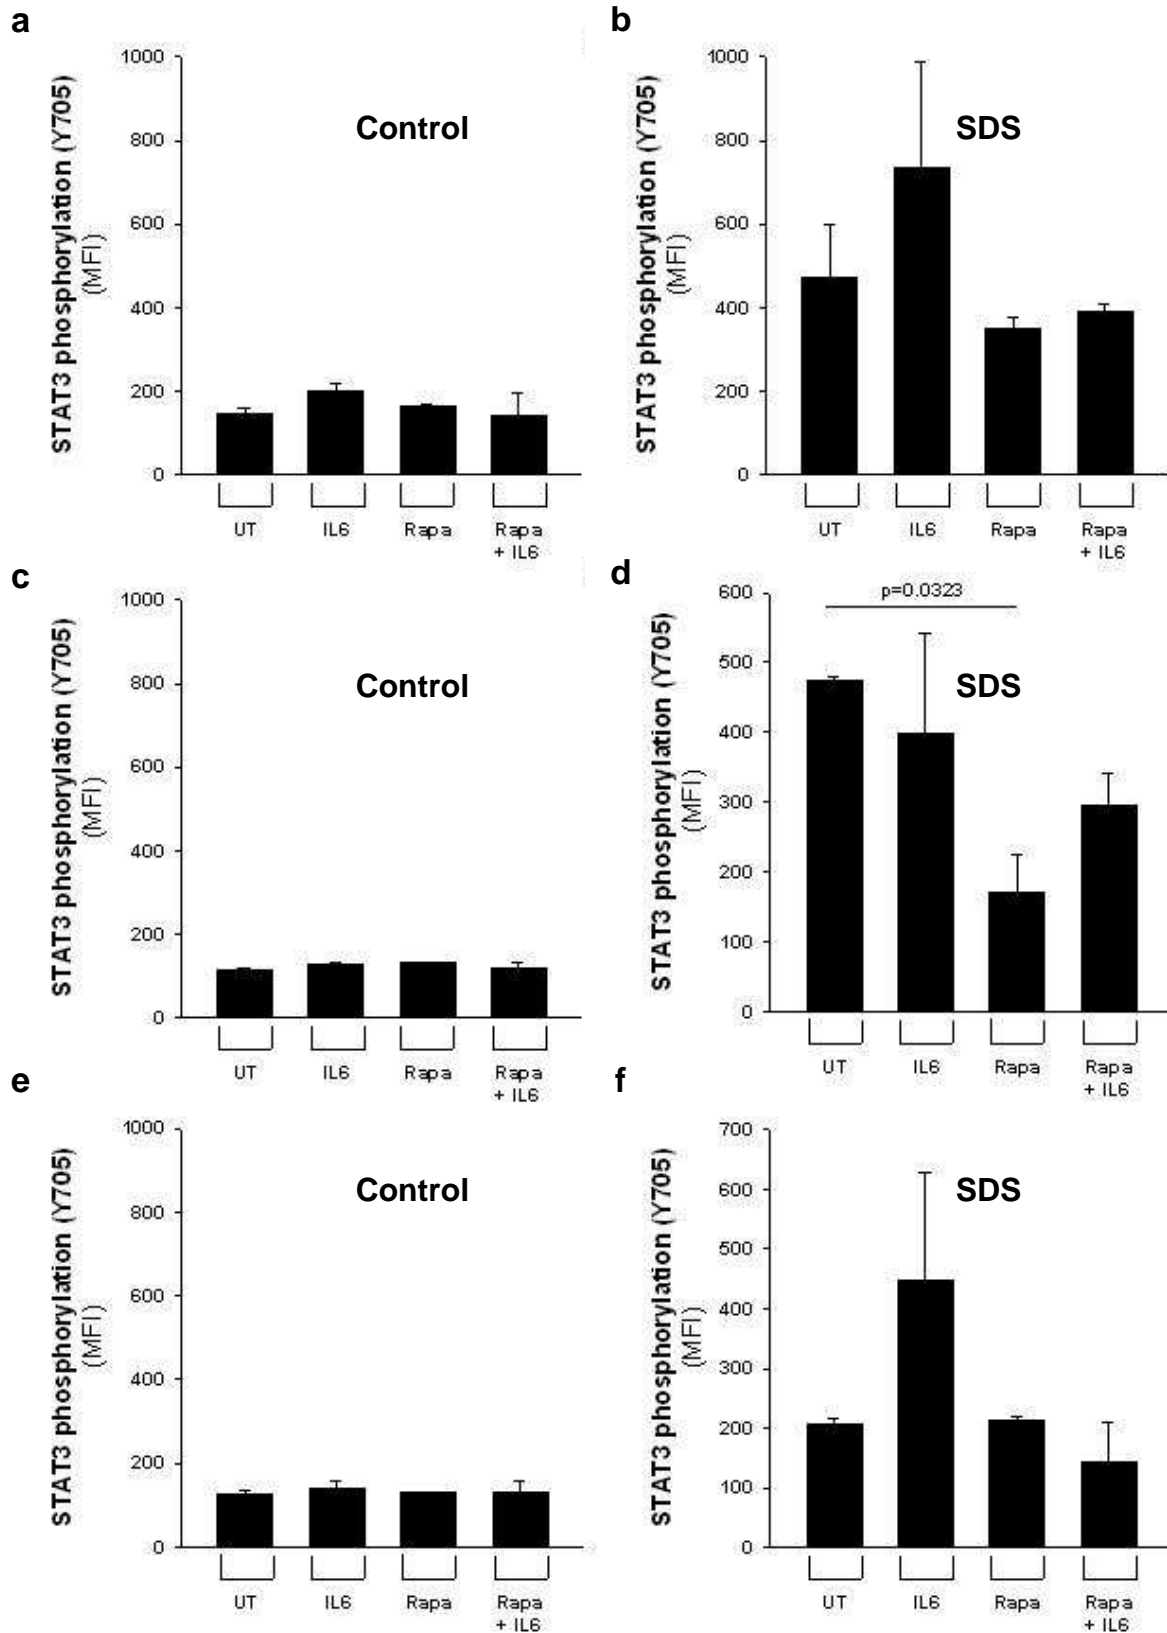

Figure S8

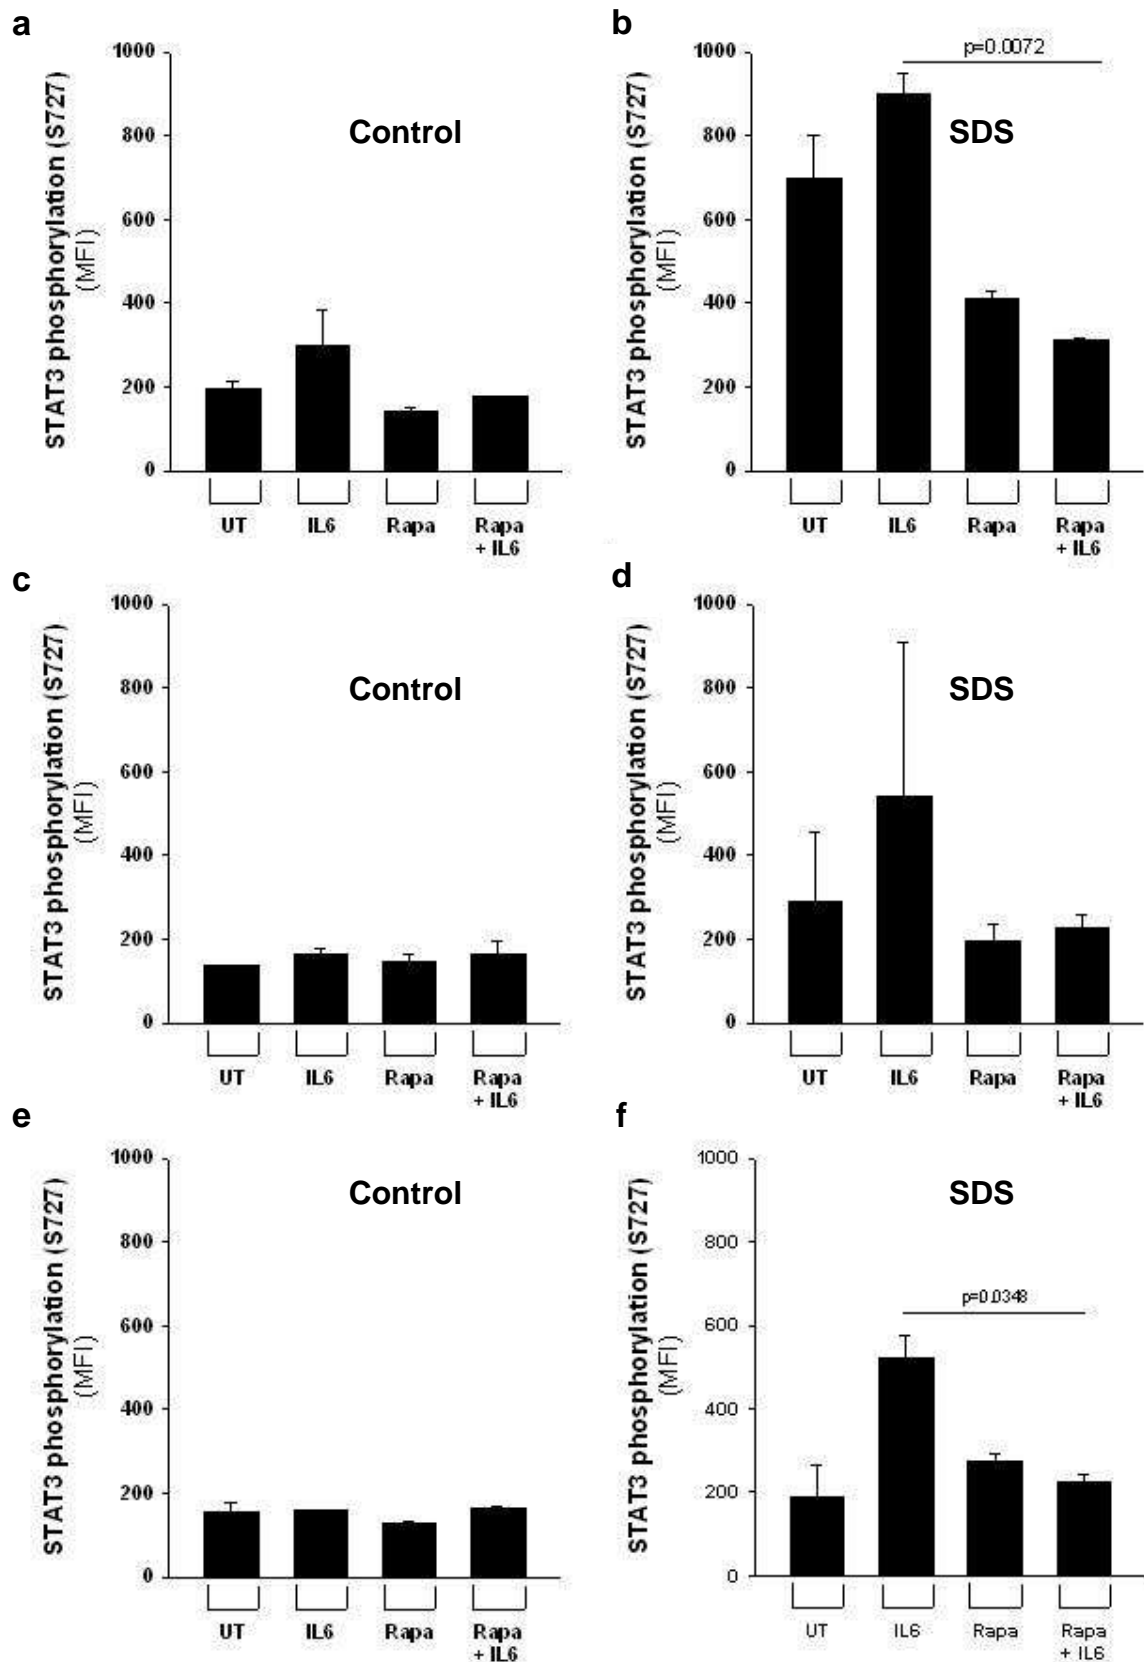

Supplement: srep33165-s1.pdf [file srep33165-s1.pdf]
